# Supplementary material for: Cellular and molecular characterization of a stem rust resistance locus on wheat chromosome 7AL
Source: PubMed Central journal article supplement (PMC5143453; doi:10.1186/s13104-016-2320-z), 2016-12-07
Supplement: 13104_2016_2320_MOESM3_ESM.pdf [file 13104_2016_2320_MOESM3_ESM.pdf]

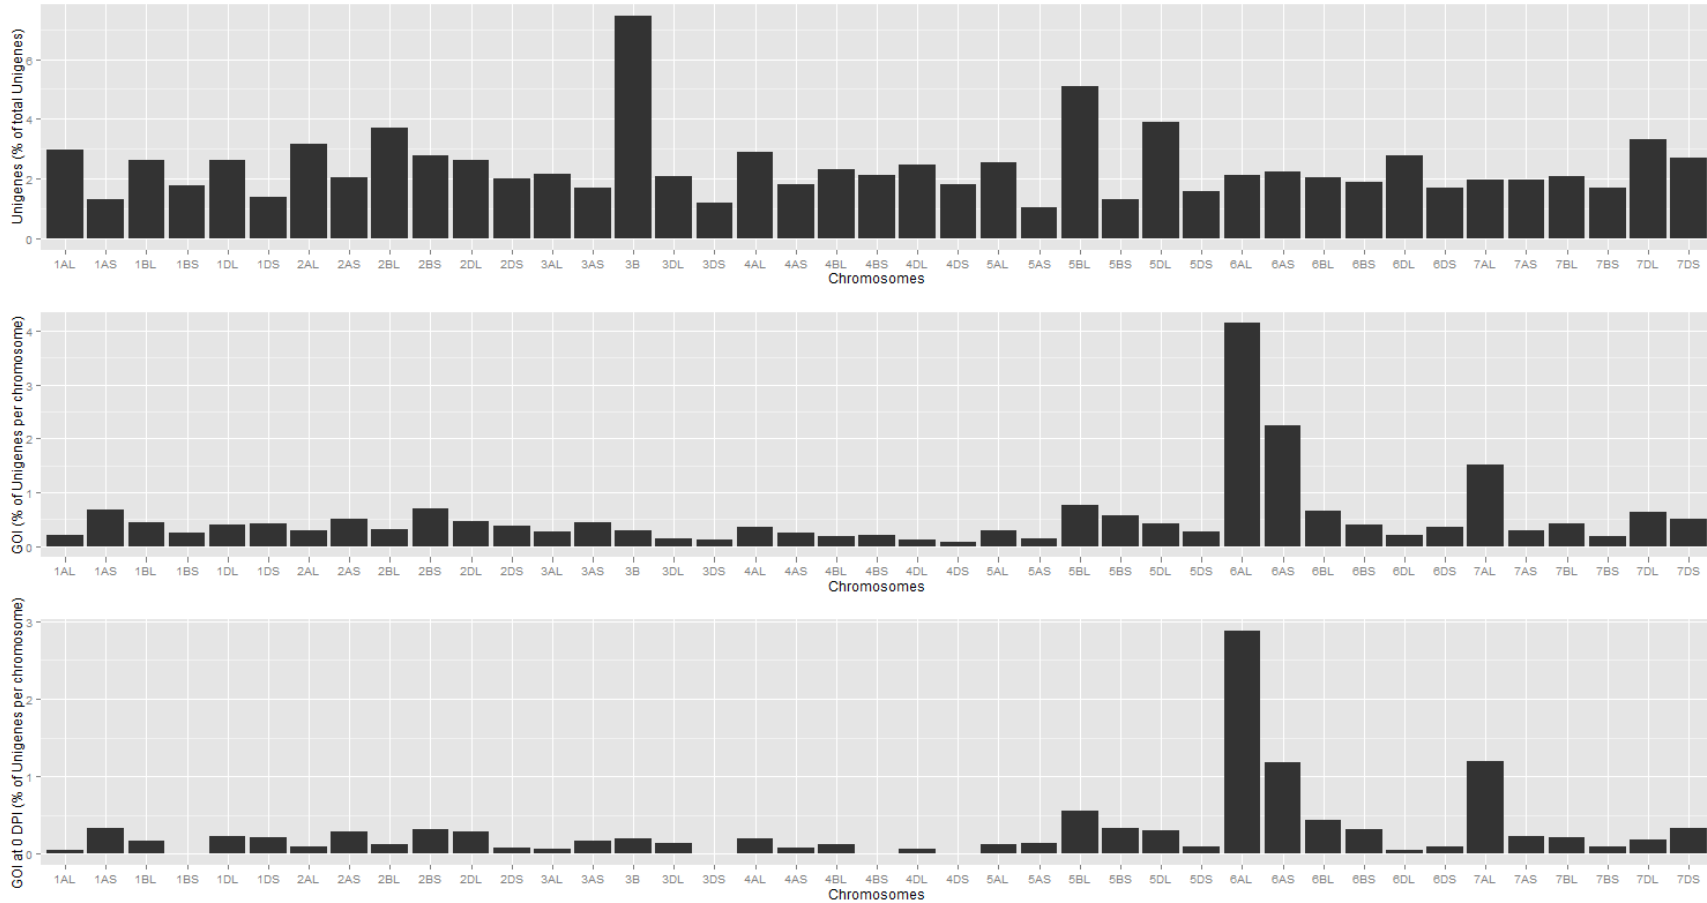

Genomic distribution of Unigenes. Top: the percent of total expressed Unigenes (67,156) on each chromosome. Note: chromosome 3B includes both 3BL and 3BS. Middle: the number of the 353 genes of interest (GOIs) on each chromosome, expressed as a percent of the total number of expressed Unigenes assigned to that chromosome (percent of Unigenes per chromosome). Bottom: the number of the 198 GOIs that were DE at ODPI on each chromosome expressed as a percent of the total number of expressed Unigenes assigned to each chromosome.
